# Supplementary material for: A muscle fatigue-like contractile decline was recapitulated using skeletal myotubes from Duchenne muscular dystrophy patient-derived iPSCs
Source: PubMed Central journal article supplement — Cell Rep Med. 2021 Jun 4;2(6):100298. doi: 10.1016/j.xcrm.2021.100298 (PMC8233665; doi:10.1016/j.xcrm.2021.100298), 2021-06-04
Supplement: mmc1.pdf [file mmc1.pdf]

**Cell Reports Medicine, Volume 2**

**Supplemental information**

**A muscle fatigue-like contractile decline was  
recapitulated using skeletal myotubes from  
Duchenne muscular dystrophy patient-derived iPSCs**

**Tomoya Uchimura, Toshifumi Asano, Takao Nakata, Akitsu Hotta, and Hidetoshi Sakurai**

Supplementary information

Figure S1

a

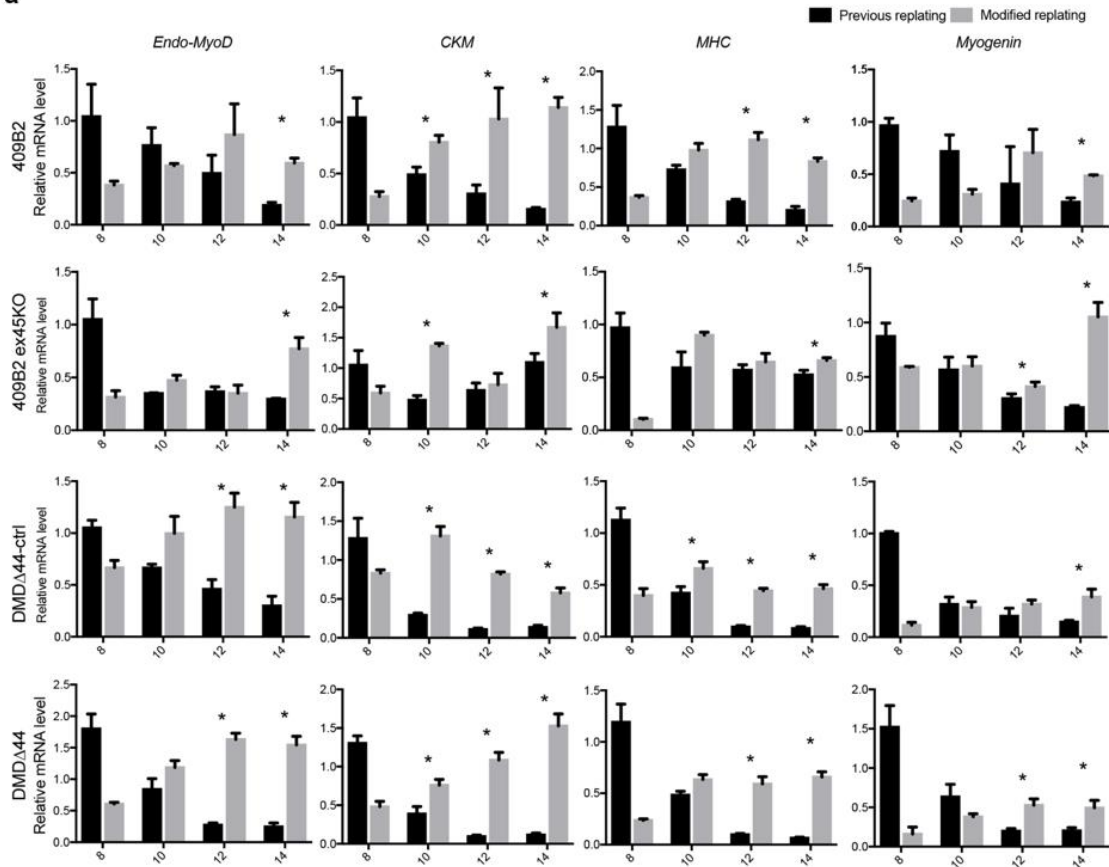

b

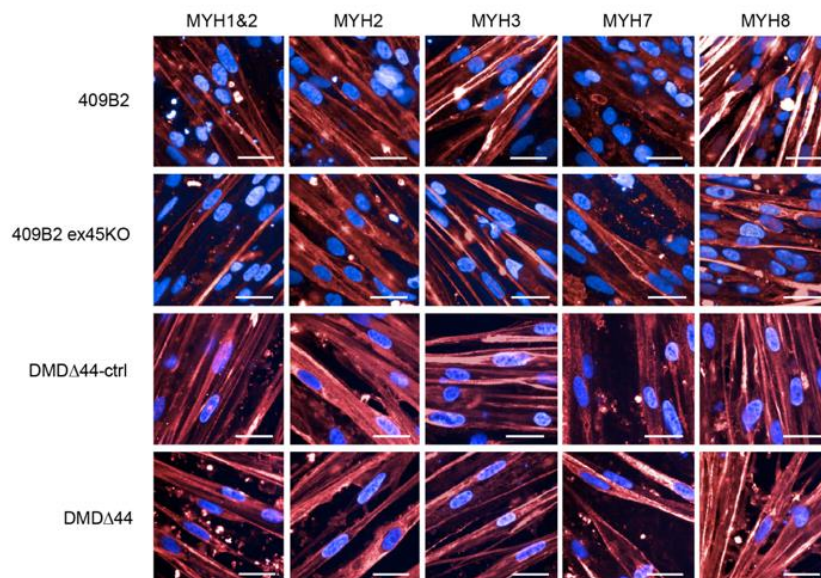

**Figure S1. Gene expression analyses of hiPSC-skeletal myotubes differentiated by the modified replating method.** (A) RT-qPCR analysis of endogenous-MyoD, CKM, MHC, and myogenin of 409B2, 409B2 ex45KO, DMDΔ44-ctrl, and DMDΔ44 myotubes differentiated by previously described and modified replating methods. Data represent the mean  $\pm$  SD and were analyzed with an unpaired *t*-test from three biological replicates. \* indicates  $P < 0.05$  (B) Immunocytochemical analysis of each type of MYH of 409B2, 409B2 ex45KO, DMDΔ44-ctrl, and DMDΔ44 myotubes differentiated by previously described and modified replating methods. Scale bar = 20  $\mu$ m. Related to Figure 1.

**Figure S2**

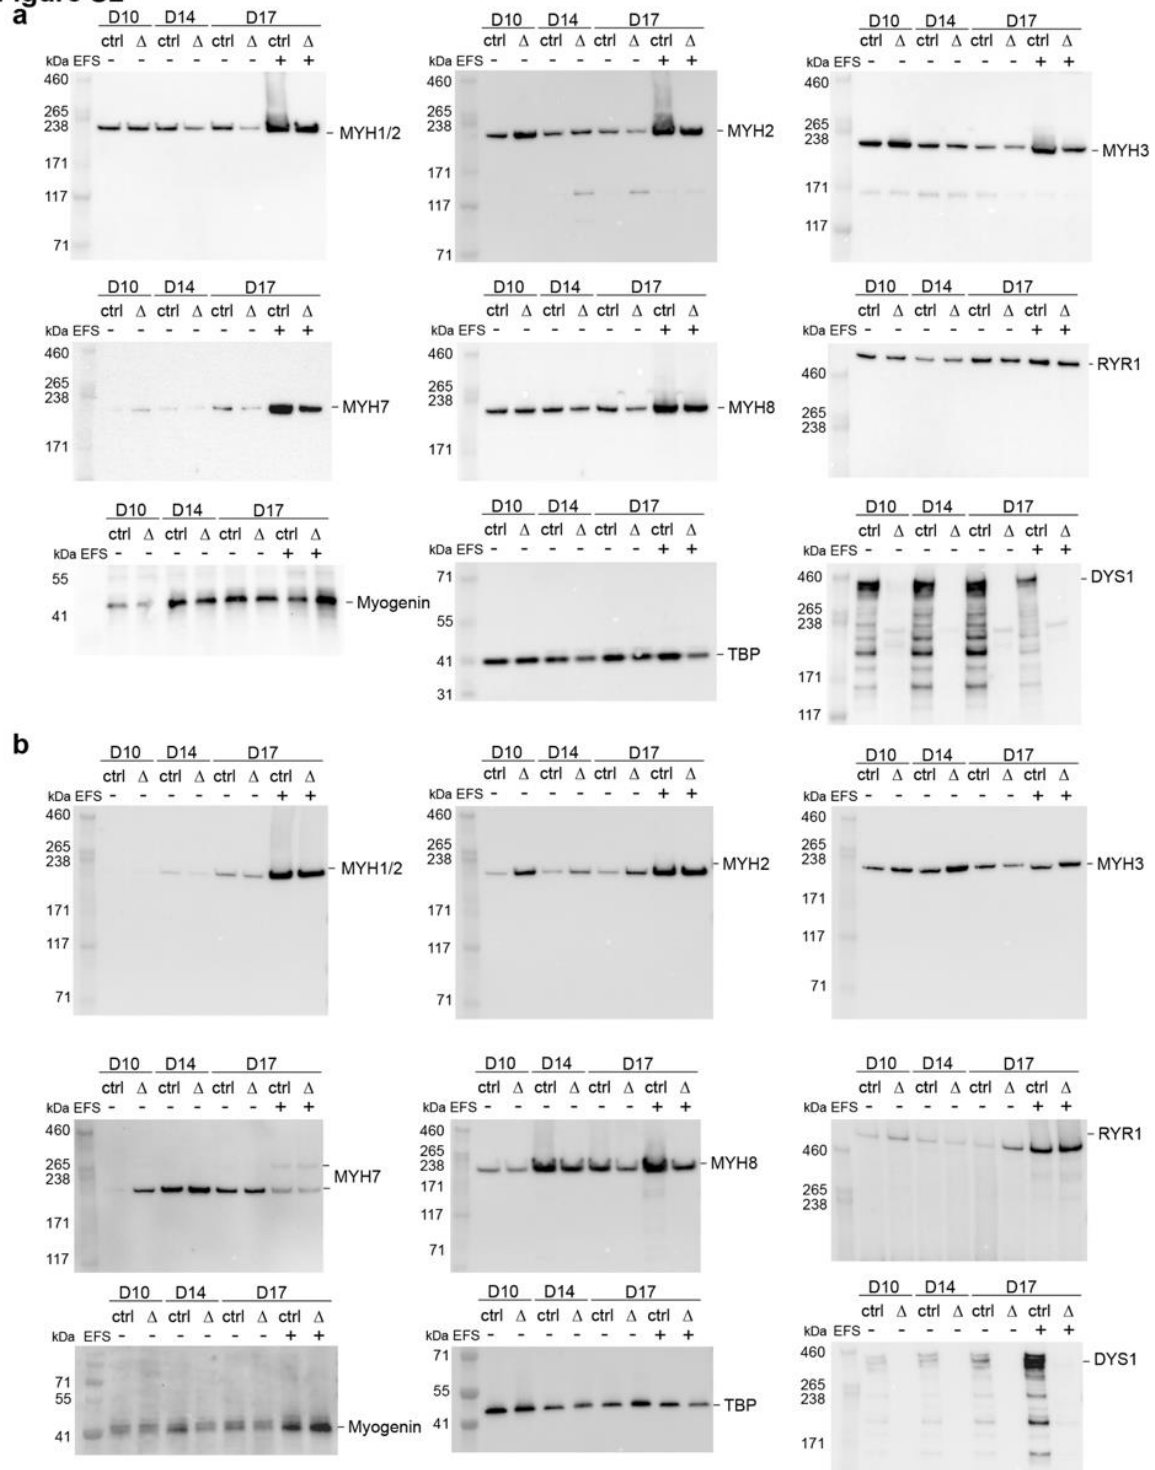

**Figure S2. Western blot analysis of hiPSC-skeletal myotubes differentiated by the modified replating method in the absence or presence of EFS stimulation. (A-B) Western blotting using antibodies for differentiation and maturation-related markers. (A) DMD $\Delta$ 44 clone (B) 409B2 clone. Related Figure 1 and 2.**

**Figure S3**

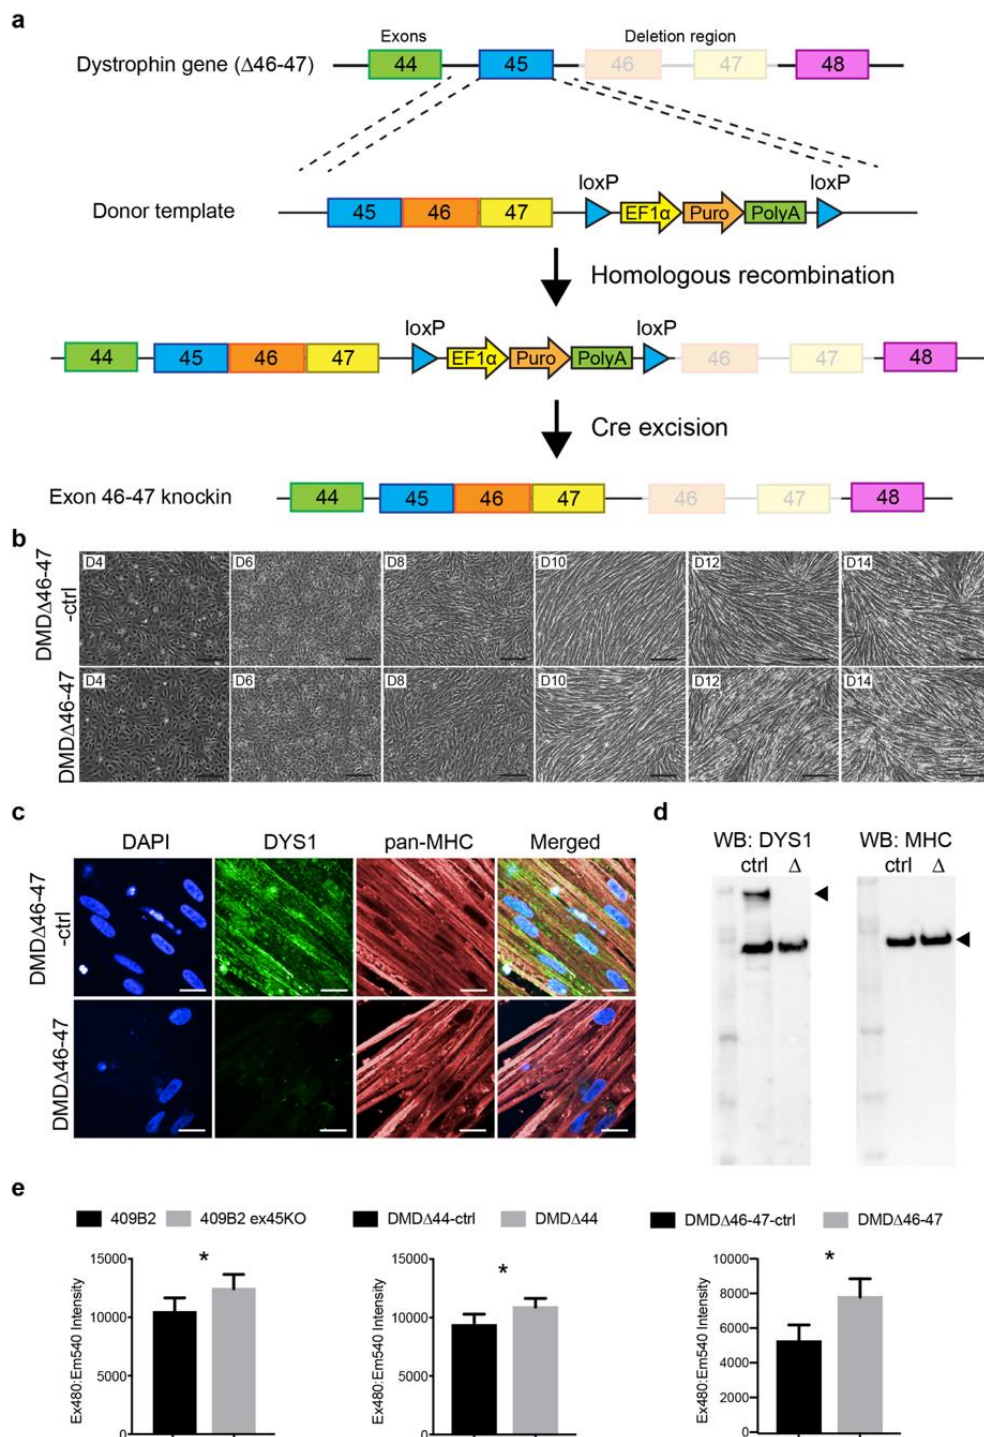

**Figure S3. An isogenic control iPSC line of DMD- $\Delta$  46–47 generated using a CRISPR/Cas9 knock-in.** (A) A schematic diagram of CRISPR/Cas9-mediated exon 6–7 knock-in using DMD- $\Delta$  46–47 iPSCs. (B) Bright-field images of time-course myogenic differentiation of DMD- $\Delta$ 46-47-CKI and DMD- $\Delta$  46–47 lines using the modified replating method. Scale bar = 200  $\mu$ m. (C) Day 14 immunocytochemical analysis of pan-MHC and DYS1 in differentiated DMD- $\Delta$ 46-47-CKI and DMD- $\Delta$  46–47 myotubes using the modified replating method. Scale bar = 20  $\mu$ m. (D) Day 14 western blot analysis of differentiated DMD- $\Delta$ 46-47-CKI and DMD- $\Delta$  46–47 myotubes using the modified replating method. Arrowheads indicate each band corresponding to full-length dystrophin and MHC. (E) The  $\text{Ca}^{2+}$  mobilization assay was conducted using an FDSS/ $\mu$ cell system. Quantitative analyses of differences of maximum and minimum  $\text{Ca}^{2+}$  peaks using 409B2, DMD- $\Delta$ 44, and DMD- $\Delta$  46–47 lines. Data represent the mean  $\pm$  SD and were analyzed with an unpaired *t*-test from three biological replicates. \* indicates  $P < 0.05$ . Related to STAR Methods.

**Figure S4**

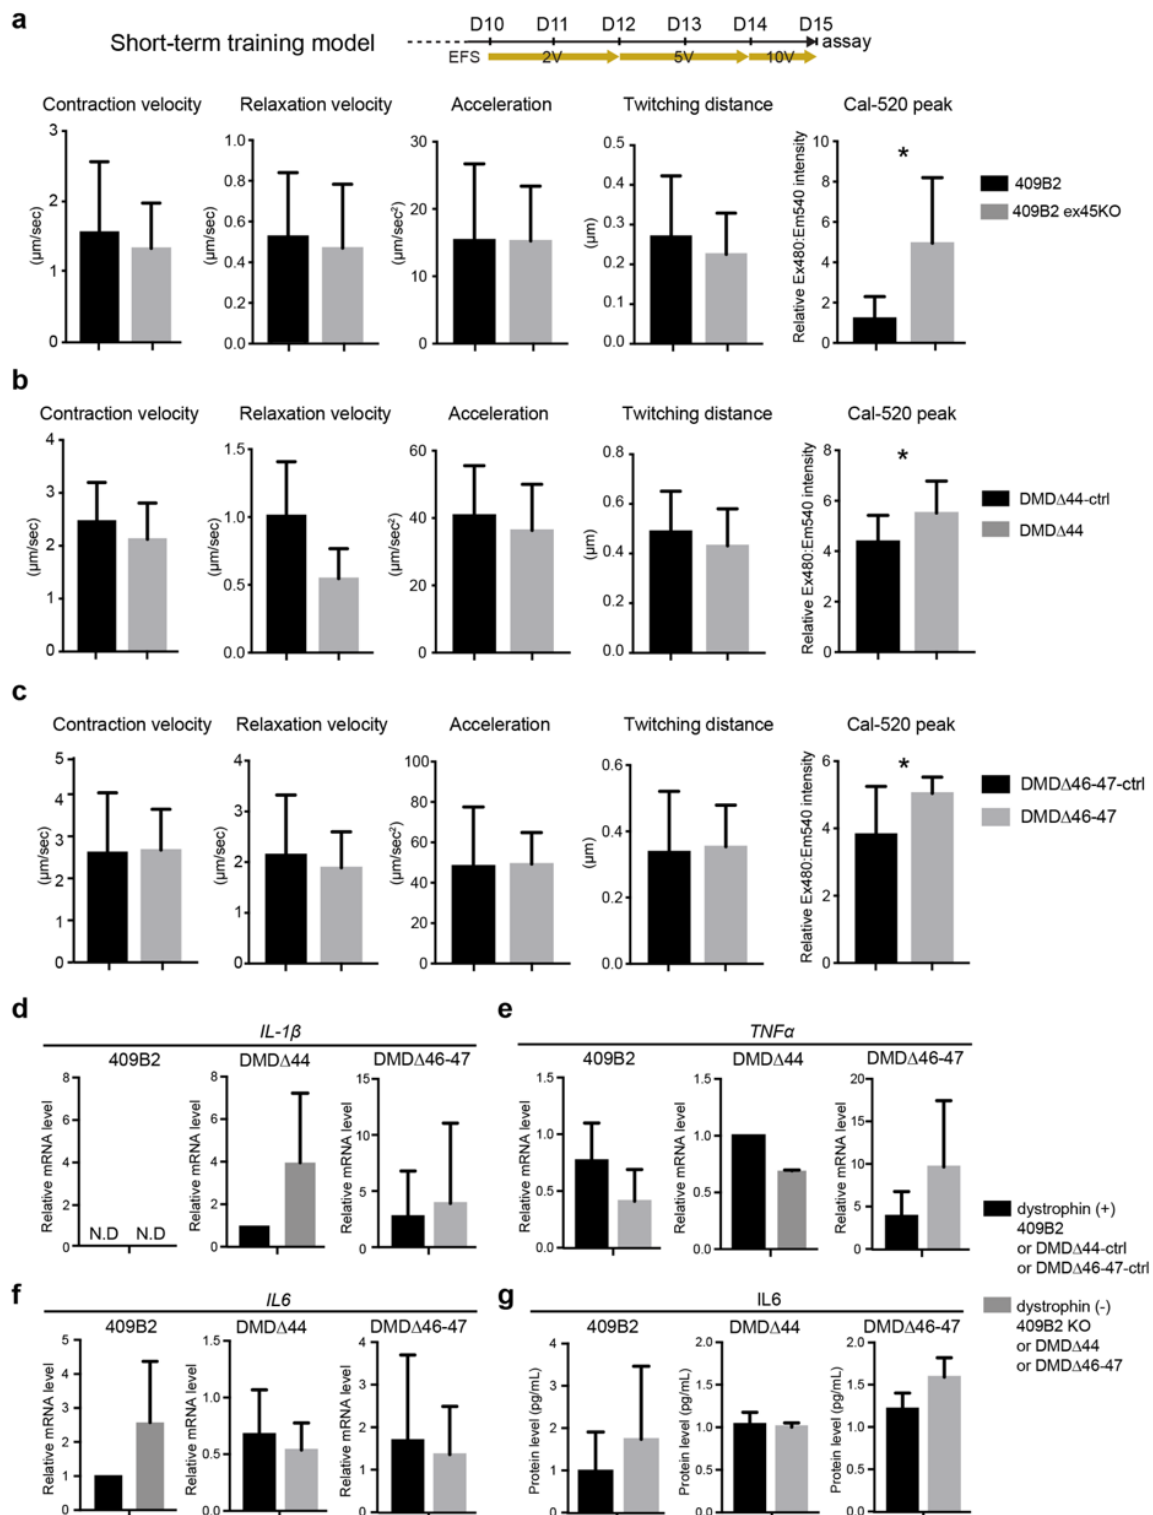

**Figure S4. Comparable muscle performance observed in dystrophic myotubes at day 15 in the short-term EFS training model using three donor-derived iPSCs.** (A-C) Functional analyses and Ca<sup>2+</sup> peak assay in the short-term training model of differentiated and matured myotubes from three donor-derived iPSCs on day 15 using the SI8000 system. A: 409B2, B: DMDΔ44, C: DMDΔ46-47. (D-F) RT-qPCR analyses in the short-term training model of inflammation-related response-related genes on day 15. D: IL-1β, E: TNFα, F: IL6. (G) ELISA of IL6 protein levels in conditioned media harvested on day 15 from the short-term training model. Data represent the mean ± SD and were analyzed with an unpaired *t*-test from at least three biological replicates. \* indicates *P* < 0.05. N.D = non-detectable. Related to Figure 3.

Figure S5

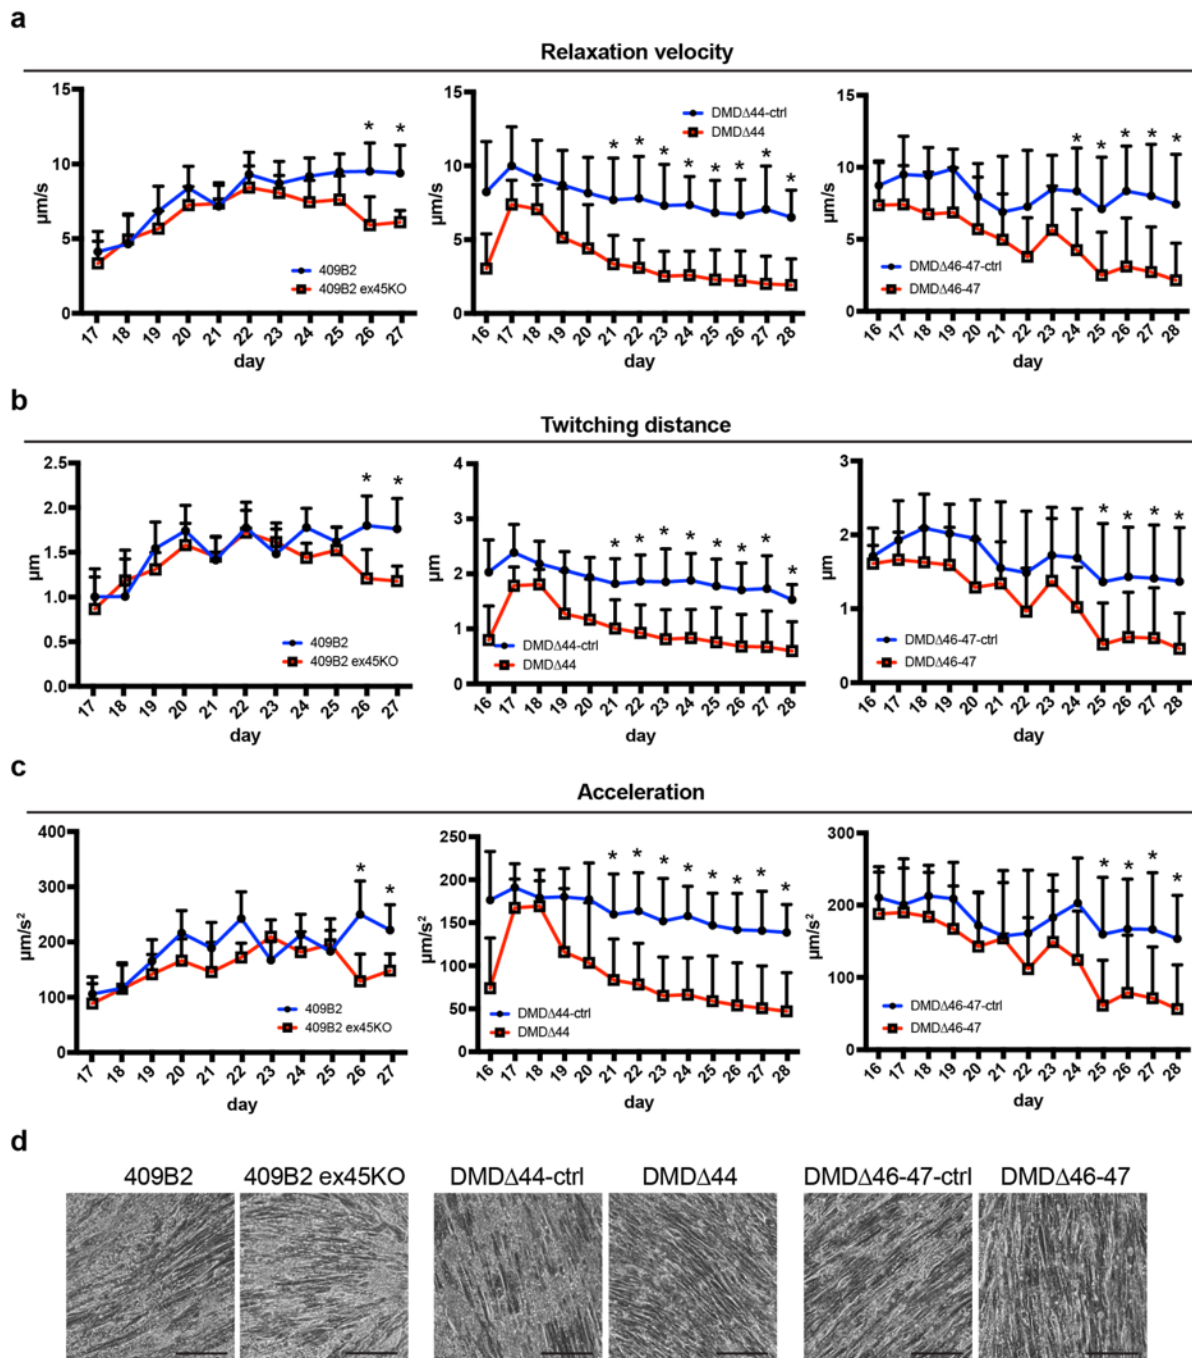

**Figure S5. A gradual decline in muscle performance recapitulating the muscle fatigue-like symptoms of DMD was observed in dystrophic cells in the long-term EFS training model using three donor-derived iPSCs. (A–C) Quantitative time-course analyses of relaxation velocity, twitching distance, and acceleration using an SI8000 motion imaging system. A: 409B2, B: DMD-Δ44, C: DMD-Δ46-47. Data represent the mean  $\pm$  SD and were analyzed with an unpaired  $t$ -test from at least three biological replicates. \* indicates  $P < 0.05$ . (D) Bright-field images indicate that muscle fatigue-like symptoms did not accompany cellular damage or cell death in the long-term training model at day 28. Scale bar = 400  $\mu$ m. Related to Figure 4.**

**Figure S6**

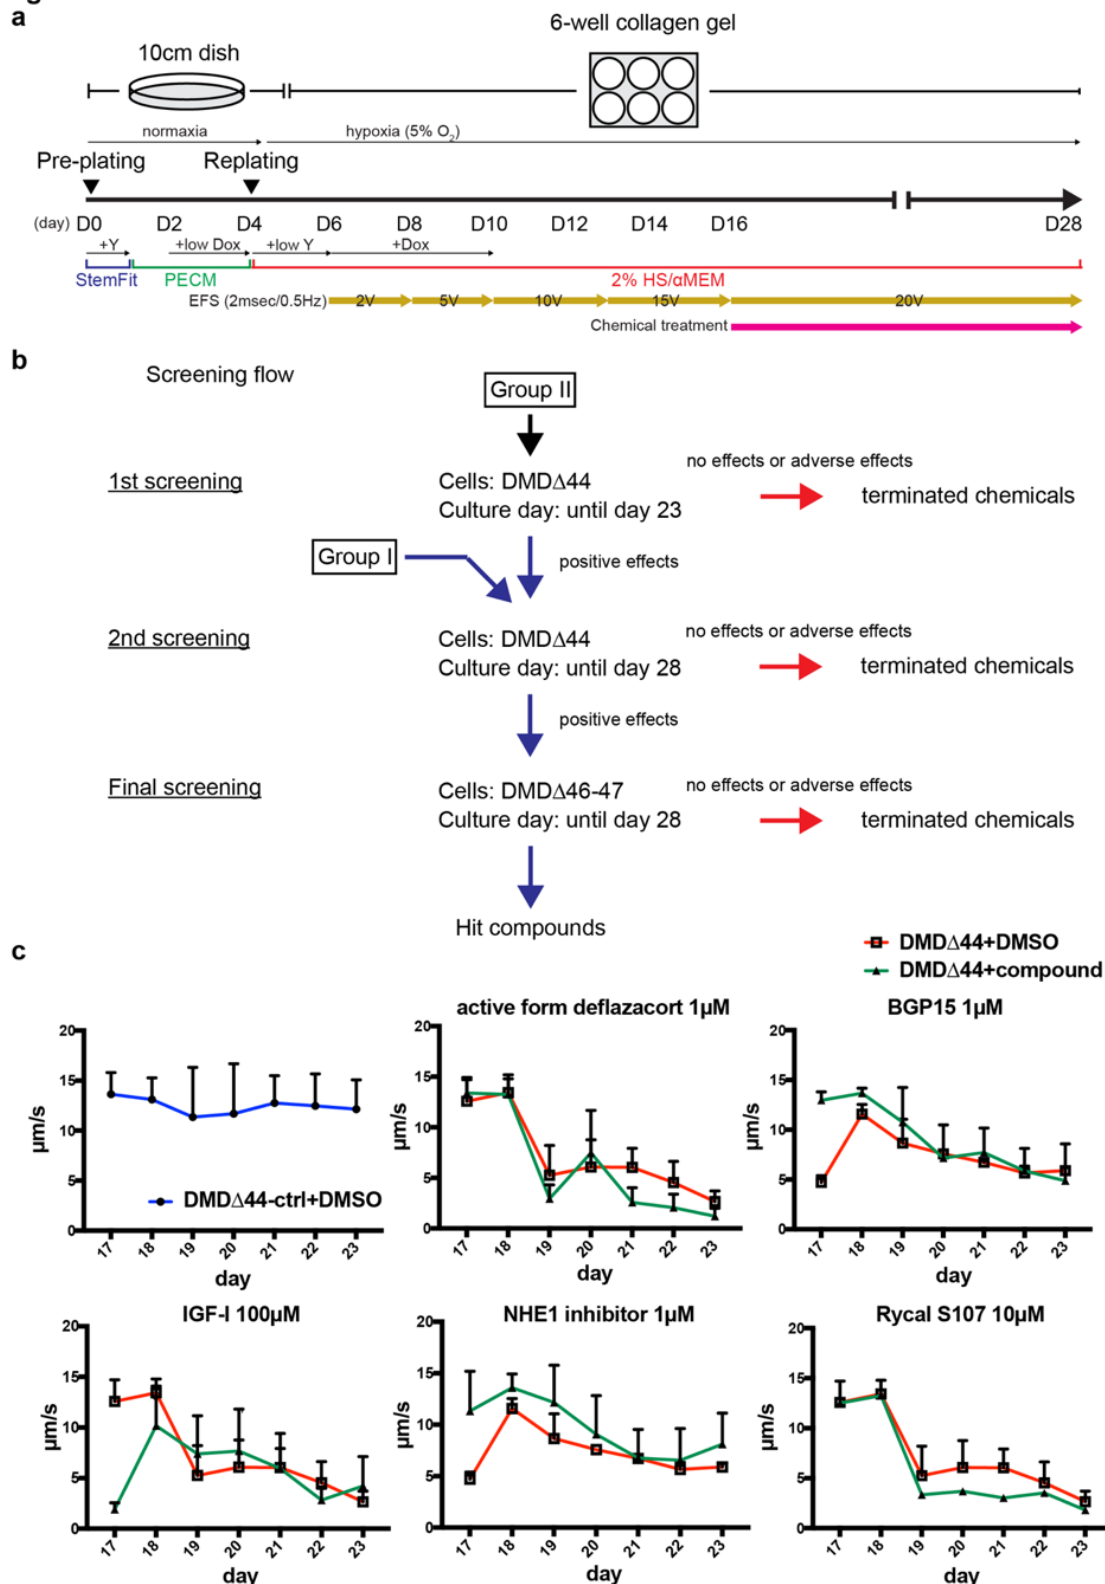

**Figure S6. Small-scale screening in the long-term EFS training model.** (A) A schematic diagram of each compound's administration in the long-term training model. (B) A schematic diagram of the screening strategy using two DMD patient-specific iPSCs, DMDΔ44 and DMDΔ 46–47. (C) Representative data from the first screening showing no or negative effects upon the administration of compounds. Data represent the mean  $\pm$  SD and were analyzed with an unpaired *t*-test from at least three biological replicates. Related to Figure 5.

**Figure S7**

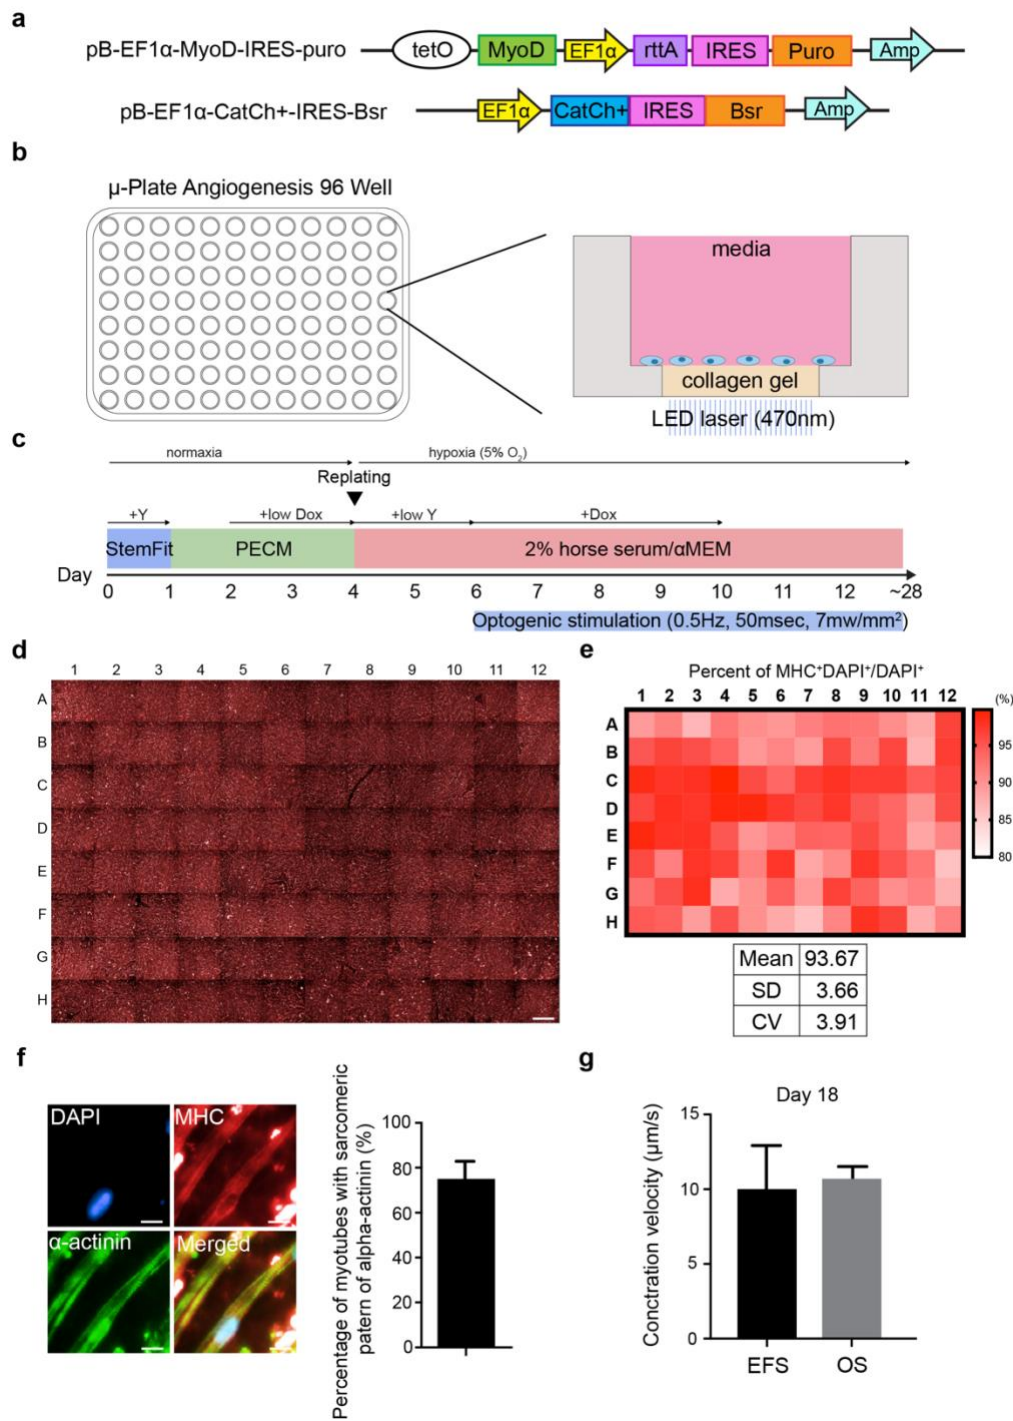

**Figure S7. A 96-well plate screening model using optogenetic technology.** (A) The plasmids map used to establish iPSC clones stably expressing dox-inducible MyoD and CatCh+, a channelrhodopsin-2 variant. (B) An image of a  $\mu$ -plate Angiogenesis 96 well plate and collagen gel preparation in the bottom layer of the plate. Optogenetics stimulation (OS) training was applied to cells using a blue (470 nm) LED laser from the bottom of the plate, leading to the cell membrane depolarization. (C) An OS protocol. (D) Representative immunofluorescent staining of pan-MHC at day 28 in the long-term training model under OS (scale bar = 200 $\mu$ m) and (E) statistical analysis to calculate the coefficient value. (F) Fusion index analysis of DMD $\Delta$ 44 myotubes at day 18 under OS. (G) Immunofluorescent staining of pan-MHC and  $\alpha$ -actinin on differentiated iPSC-myotubes at day 18 under OS. Scale bar = 20  $\mu$ m. (H) Contractile performance of DMD $\Delta$ 44 myotubes at day 18 under EFS and OS. Data represent the mean  $\pm$  SD from five biological replicates. Related to Figure 6.
